# Supplementary figures and images for: Chemical Diversity between Three Graminoid Plants Found in Western Kenya Analyzed by Headspace Solid-Phase Microextraction Gas Chromatography–Mass Spectrometry (HS-SPME-GC-MS)
Source: MDPI journal article supplement (doi:10.3390/plants10112423), 2021-11-10

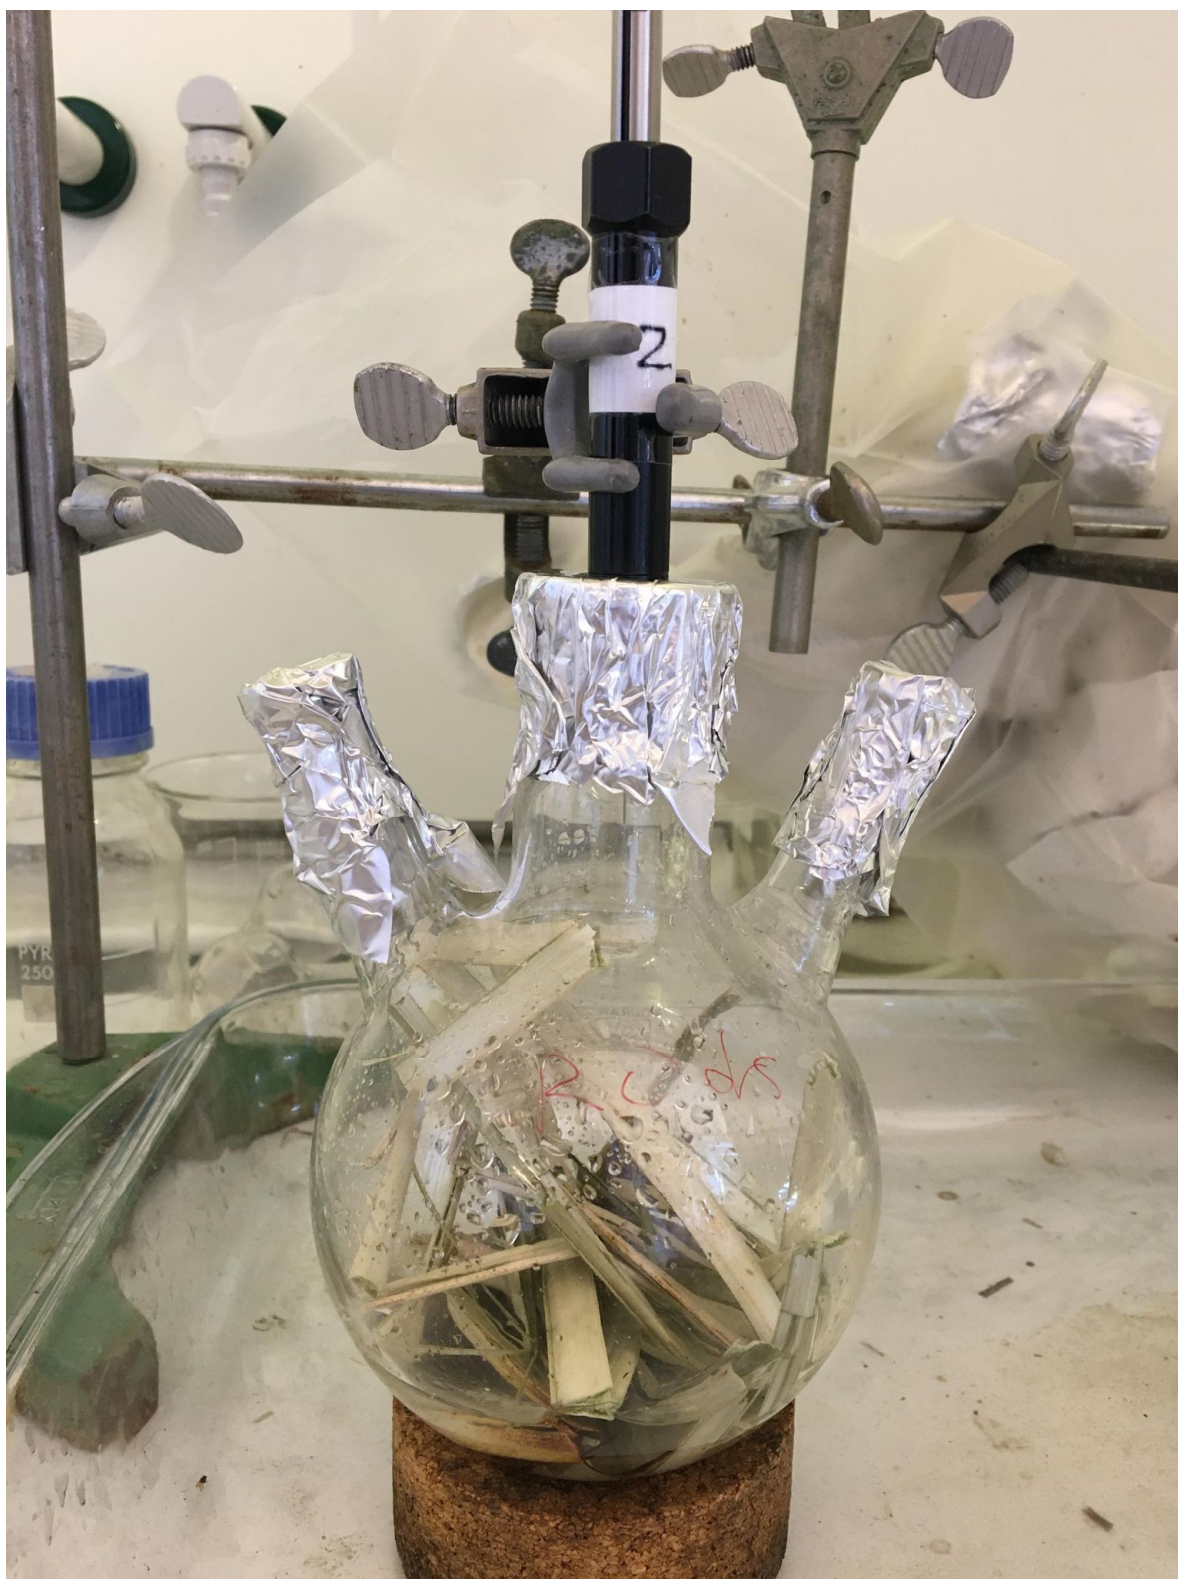

Supplement: s1 [file s1]
